# Supplementary material
Source: MDPI journal article supplement (https://www.mdpi.com/2306-5729/4/2/49)
Supplement: s1 [file s1]

## NGHIÊN CỨU SỞ THÍCH VÀ THÓI QUEN ĐỌC SÁCH

(Học sinh các trường THCS Yên Mô Ninh Bình)

Phiếu số: .....  
 Ngày: .....  
 Địa điểm: .....

Các em học sinh thân mến!

Sách là người bạn thân thiết của mỗi chúng ta vì thông qua sách chúng ta học được biết bao điều bổ ích. Các em hãy trả lời trung thực, thẳng thắn những suy nghĩ, sở thích, thói quen và cả những mong muốn của mình về việc đọc sách.

Cảm ơn các em đã tham gia khảo sát nhằm giúp xã hội hiểu rõ hơn nhu cầu và thói quen đọc sách trong trường học và gia đình.

### 1. Thông tin về cá nhân

Họ và tên: .....  
 Học lớp mấy: ..... ☐ VNEN ☒ Nam ☐ Nữ  
 Điểm TB chung bình cộng các môn Toán, Lý, (Hóa), Sinh của bài kiểm tra 45p gần đây nhất là: .....  
 Điểm TB chung bình cộng bài kiểm tra giữa kỳ Toán và các môn học tự nhiên là: ..... (lớp VNEN).  
 Con thứ mấy trong nhà: ..... Số anh chị em trong nhà: .....  
 Em có thích đọc sách không? ☒ Có ☐ Không  
 Nếu có, thì em thích đọc loại sách về nhóm chủ đề học nào nhất trong danh sách dưới đây (chỉ chọn một)  
☐ Toán-vật lý ☐ Tự nhiên, hóa học, sinh học  
☐ Văn học ☐ Lịch sử và địa lý  
☐ Ngoại ngữ ☒ Tin học / kỹ thuật  
 Sau này, em thích làm nghề gì nhất? ..... (ghi ngắn gọn tên công việc)

### 2. Gia đình

Bố: Nghề nghiệp: ..... Tuổi: .....  
 Học vấn: ☒ Dưới THPT ☐ THPT ☐ Cao đẳng/ĐH ☐ Sau ĐH  
 Mẹ: Nghề nghiệp: ..... Tuổi: .....  
 Học vấn: ☐ Dưới THPT ☒ THPT ☐ Cao đẳng/ĐH ☐ Sau ĐH  
 Điều kiện kinh tế: ☐ Nghèo ☒ Trung bình ☐ Khá giả  
 Em có biết mức thu nhập gia đình hàng tháng không? ☒ Có ☐ Không  
 Nếu biết, ước tính mức thu nhập đó khoảng: ..... (triệu đồng), hoặc ☐ Từ chối trả lời  
 Bố mẹ có mua sách cho em không? ☐ Có ☒ Không

### 3. Thói quen/sở thích

Ngoài giờ học (trên lớp và ở nhà), khi có thời gian rảnh em thích làm gì nhất? (Chỉ chọn 1)  
☐ Đọc sách ☒ Xem tivi, nghe nhạc ☐ Giúp việc nhà/đồng áng  
☐ Quan sát thiên nhiên ☐ Giao tiếp bạn bè, gia đình ☐ Khác  
 Em dành bao nhiêu thời gian để đọc sách khoa học mỗi ngày? (không kể sách giáo khoa)  
☒ Dưới 30 phút ☐ 30-60 phút ☐ >60 phút  
 Bao nhiêu thời gian đọc sách văn học-xã hội mỗi ngày? (không kể sách giáo khoa)

☐ Dưới 30 phút      ☒ 30-60 phút      ☐ >60 phút  
Ở nhà bố/mẹ có bao giờ đọc truyện cho em nghe không?      ☐ Có      ☒ Không

#### 4. Sở thích chọn sách

Ngoài sách học, nếu được cho tặng, em sẽ ưu tiên chọn loại sách nào trong các chủ đề dưới đây? (Chỉ chọn một)

- ☐ Truyện văn học      ☐ Sách danh nhân      ☐ Phổ biến khoa học      ☐ Nghệ thuật      ☒ Hướng dẫn nghề  
☐ Khác: truyện tranh (nếu một loại tiêu biểu)

Nguyên nhân khiến em lựa chọn loại sách đó? (Chỉ chọn một)

- ☒ Sở thích cá nhân      ☐ Bố mẹ khuyến khích      ☐ Thầy cô/bạn bè giới thiệu      ☒ Tình cờ gặp thông tin

Nguyên sách đọc chủ yếu là từ? (Chỉ chọn một)

- ☒ Bố mẹ mua / tự mua      ☐ Mượn bạn / thư viện      ☐ Phần thưởng / được cho tặng

Bắt gặp nội dung hay khi đọc sách hay em ưu tiên làm gì trong các việc sau? (Chỉ chọn một)

- ☒ Kể lại/chia sẻ với bạn bè, người thân      ☐ Ghi chép điều đáng nhớ để sử dụng  
☐ Thử thực hành theo nội dung ẩn tượng      ☐ Suy nghĩ và liên hệ với hiểu biết của bản thân

Với thói quen đọc sách, sau mỗi cuốn sách hay, em sẽ: (Chỉ chọn một)

- ☒ Tìm thêm sách về chủ đề đó      ☐ Tìm đọc chủ đề liên quan gần gũi  
☐ Tìm đọc sang chủ đề mới      ☐ Đọc lại lần nữa

Hãy kể tên 2 cuốn sách mà em thích nhất cho tới thời điểm này:

- 1) quyển người tốt học tốt  
2) hướng dẫn nấu ăn

#### 5. Về tủ sách lớp học:

5.1. Em có thích tham gia các hoạt động khuyến khích đọc sách không?      ☒ Có      ☐ Không

5.2. Nếu có thích thì em thích hoạt động nào sau đây nhất?

- ☐ Giới thiệu, triển lãm sách      ☐ Thi kể chuyện      ☐ Thi sáng tác      ☒ Vẽ tranh minh họa nội dung

5.3. Theo em tủ sách lớp học hiện thế nào?

- ☐ Phong phú, hấp dẫn      ☐ Thiếu sách hay      ☐ Thiếu sách      ☒ Chưa có tủ sách

Hãy kể tên ba cuốn sách em rất thích mà chưa được đọc, vì chưa có trong tủ sách

- 1) Đồ rì mon  
2) cổ nan  
3) quyển người tốt học tốt

Người đối chiếu/kiểm tra:

Người thu nhận phiếu khảo sát:

Tên/chữ ký: Phạm Thị Sáu

Tên/chữ ký: Lê Thị Kim Thanh
