# Supplementary material
Source: MDPI journal article supplement (https://www.mdpi.com/2306-5729/4/2/49)
Supplement: s1 [file s1]

## NGHIÊN CỨU SỞ THÍCH VÀ THÓI QUEN ĐỌC SÁCH

(Học sinh các trường THCS Yên Mô Ninh Bình)

Phiếu số: 65  
Ngày: 4/12/2017  
Địa điểm: Trường học cơ sở Thành Chính

Các em học sinh thân mến!

Sách là người bạn thân thiết của mỗi chúng ta vì thông qua sách chúng ta học được biết bao điều bổ ích. Các em hãy trả lời trung thực, thẳng thắn những suy nghĩ, sở thích, thói quen và cả những mong muốn của mình về việc đọc sách.

Cảm ơn các em đã tham gia khảo sát nhằm giúp xã hội hiểu rõ hơn nhu cầu và thói quen đọc sách trong trường học và gia đình.

### 1. Thông tin về cá nhân

Họ và tên: Nguyễn T. Thành Ngân

Học lớp mấy: 6A ☐ VNEN ☐ Nam ☒ Nữ

Điểm TB chung bình cộng các môn Toán, Lý, (Hóa), Sinh của bài kiểm tra 45p gần đây nhất là: 8,6

Điểm TB chung bình cộng bài kiểm tra giữa kỳ Toán và các môn học tự nhiên là: (lớp VNEN).

Con thứ mấy trong nhà: Con thứ 1 Số anh chị em trong nhà: 3

Em có thích đọc sách không? ☐ Có ☐ Không

Nếu có, thì em thích đọc loại sách về nhóm chủ đề học nào nhất trong danh sách dưới đây (chỉ chọn một)

☒ Toán-vật lý

☐ Tự nhiên, hóa học, sinh học

☐ Văn học

☐ Lịch sử và địa lý

☐ Ngoại ngữ

☐ Tin học / kỹ thuật

Sau này, em thích làm nghề gì nhất? Đầu bếp (ghi ngắn gọn tên công việc)

### 2. Gia đình

Bố: Nghề nghiệp: Bán hàng Tuổi: 37

Học vấn: ☐ Dưới THPT ☐ THPT ☒ Cao đẳng/ĐH ☐ Sau ĐH

Mẹ: Nghề nghiệp: Làm ruộng Tuổi: 34

Học vấn: ☐ Dưới THPT ☐ THPT ☒ Cao đẳng/ĐH ☐ Sau ĐH

Điều kiện kinh tế: ☐ Nghèo ☒ Trung bình ☐ Khá giả

Em có biết mức thu nhập gia đình hàng tháng không? ☐ Có ☒ Không

Nếu biết, ước tính mức thu nhập đó khoảng: (triệu đồng), hoặc ☐ Từ chối trả lời

Bố mẹ có mua sách cho em không? ☐ Có ☒ Không

### 3. Thói quen/sở thích

Ngoài giờ học (trên lớp và ở nhà), khi có thời gian rảnh em thích làm gì nhất? (Chỉ chọn 1)

☐ Đọc sách

☒ Xem tivi, nghe nhạc

☐ Giúp việc nhà/đồng áng

☐ Quan sát thiên nhiên

☐ Giao tiếp bạn bè, gia đình

☐ Khác

Em dành bao nhiêu thời gian để đọc sách khoa học mỗi ngày? (không kể sách giáo khoa)

☒ Dưới 30 phút

☐ 30-60 phút

☐ >60 phút

Bao nhiêu thời gian đọc sách văn học-xã hội mỗi ngày? (không kể sách giáo khoa)

☐ Dưới 30 phút      ☒ 30-60 phút    ☐ >60 phút  
Ở nhà bố/mẹ có bao giờ đọc truyện cho em nghe không?    ☐ Có                      ☒ Không

#### 4. Sở thích chọn sách

Ngoài sách học, nếu được cho tặng, em sẽ ưu tiên chọn loại sách nào trong các chủ đề dưới đây? (Chỉ chọn một)

☒ Truyện văn học      ☐ Sách danh nhân      ☐ Phổ biến khoa học    ☐ Nghệ thuật    ☐ Hướng dẫn nghề  
☐ Khác: ..... (nếu một loại tiêu biểu)

Nguyên nhân quan trọng nhất khiến em lựa chọn loại sách đó? (Chỉ chọn một)

☒ Sở thích cá nhân    ☐ Bố mẹ khuyên đọc    ☐ Thầy cô/bạn bè giới thiệu    ☐ Tình cờ gặp thông tin

Nguồn sách đọc chủ yếu là từ? (Chỉ chọn một)

☐ Bố mẹ mua / tự mua                      ☒ Mượn bạn / thư viện                      ☐ Phần thưởng / được cho tặng

Bắt gặp nội dung hay khi đọc sách hay em ưu tiên làm gì trong các việc sau? (Chỉ chọn một)

☒ Kể lại/chia sẻ với bạn bè, người thân      ☐ Ghi chép điều đáng nhớ để sử dụng  
☐ Thử thực hành theo nội dung ẩn tượng      ☐ Suy nghĩ và liên hệ với hiểu biết của bản thân

Với thói quen đọc sách, sau mỗi cuốn sách hay, em sẽ: (Chỉ chọn một)

☒ Tìm thêm sách về chủ đề đó                      ☐ Tìm đọc chủ đề liên quan gần gũi  
☐ Tìm đọc sang chủ đề mới                      ☐ Đọc lại lần nữa

Hãy kể tên 2 cuốn sách mà em thích nhất cho tới thời điểm này:

1) Truyện tranh.....  
2) Truyện cổ tích.....

#### 5. Về tủ sách lớp học:

5.1. Em có thích tham gia các hoạt động khuyến khích đọc sách không?    ☒ Có    ☐ Không

5.2. Nếu có thích thì em thích hoạt động nào sau đây nhất?

☐ Giới thiệu, triển lãm sách    ☐ Thi kể chuyện      ☒ Thi sáng tác      ☐ Vẽ tranh minh họa nội dung

5.3. Theo em tủ sách lớp học hiện thế nào?

☐ Phong phú, hấp dẫn      ☐ Thiếu sách hay      ☐ Thiếu sách                      ☒ Chưa có tủ sách

Hãy kể tên ba cuốn sách em rất thích mà chưa được đọc, vì chưa có trong tủ sách

1) Truyện tranh.....  
2) Truyện cổ tích.....  
3) sách tham khảo toán, lý, hóa.....

Người đối chiếu/kiểm tra:

Người thu nhận phiếu khảo sát:

Tên/chữ ký: Nguyễn Văn Tuấn

Tên/chữ ký: Phạm Nguyễn Thị Phụng
